# Supplementary material for: Rapid proliferation due to better metabolic adaptation results in full virulence of a filament-deficient Candida albicans strain
Source: PubMed Central journal article supplement (PMC8222383; doi:10.1038/s41467-021-24095-8), 2021-06-23
Supplement: 41467_2021_24095_MOESM3_ESM.pdf [file 41467_2021_24095_MOESM3_ESM.pdf]

## Description of Additional Supplementary Files

File Name: Supplementary Data 1

Description: Genes significantly up- or down-regulated ( $\pm \log_2 2$  and adjusted p-value  $< 0.05$ ) in the *eed1\Delta/\Delta* mutant compared to WT (SC5314) with citrate or CAA as sole carbon source after 12 h of growth.
